# Supplementary material for: 1H NMR Reveals the Mechanism of Potassium Lactate on Proteolysis and Taste Metabolites of Rugao Ham
Source: MDPI journal article supplement (doi:10.3390/foods12071453), 2023-03-29
Supplement: s1 [file s1]

Figure S1  $^1\text{H}$  NMR spectra of Rugao ham samples treated with 0% potassium lactate

(A), 1% potassium lactate (B) and 2% potassium lactate (C).

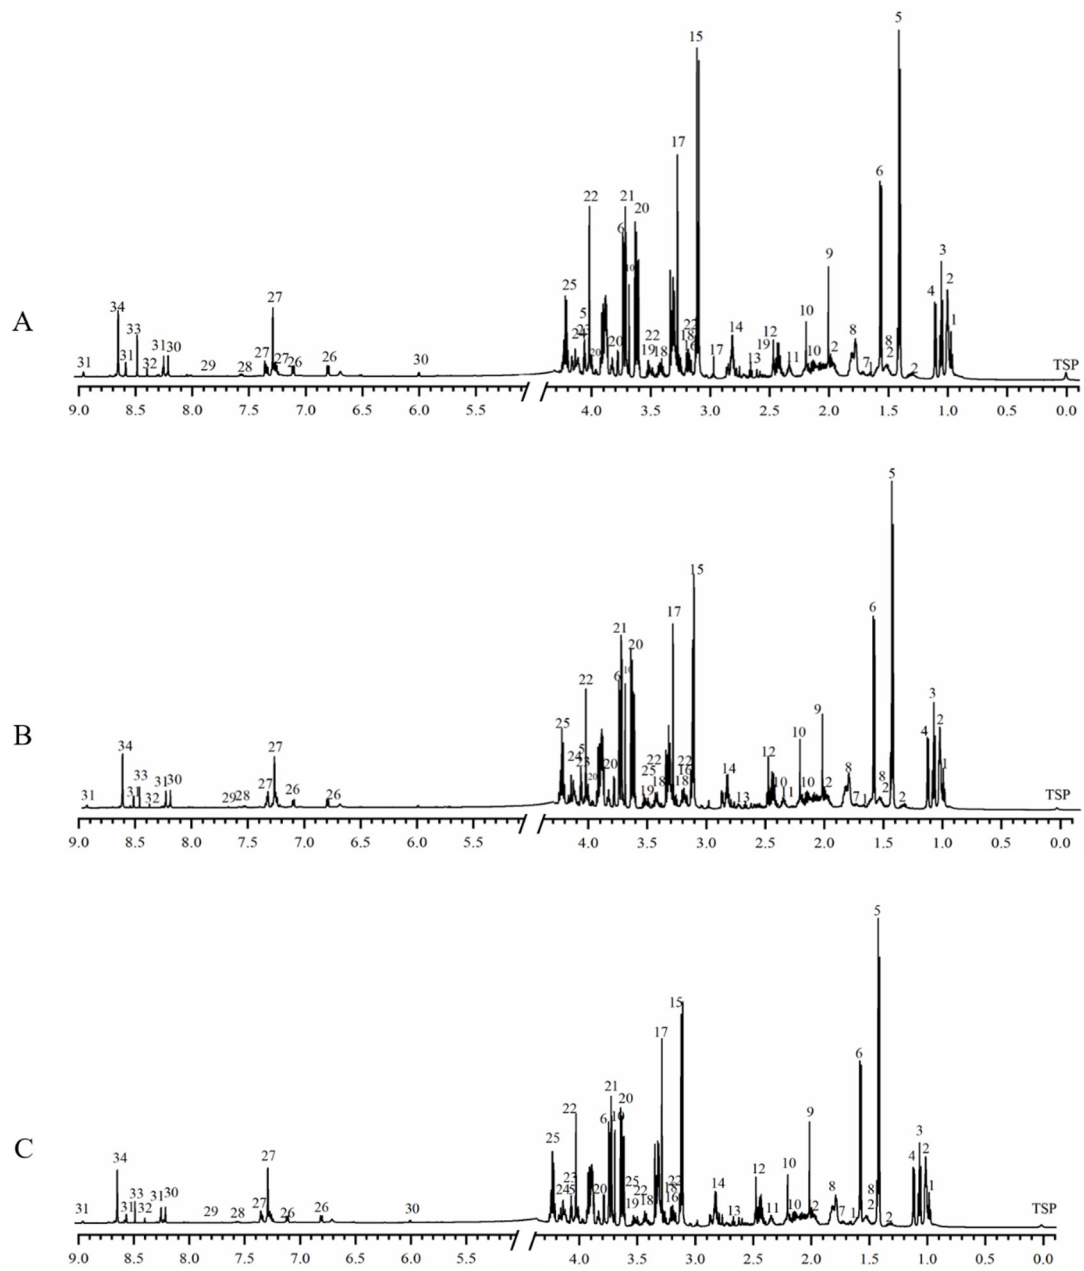

Table S1 Optical density of protein bands in the SDS-PAGE detected in Rugao hams.

|                          | molecular<br>weight<br>(kDa) | Potassium lactate levels        |                                  |                                  |                                 |
|--------------------------|------------------------------|---------------------------------|----------------------------------|----------------------------------|---------------------------------|
|                          |                              | 0%                              | 0.5%                             | 1%                               | 2%                              |
| sarcoplasmic<br>proteins | 69                           | 203830.02±47811.98 <sup>b</sup> | 226296.59±33608.41 <sup>ab</sup> | 245713.69±24049.31 <sup>ab</sup> | 292841.3±30874.3 <sup>a</sup>   |
|                          | 63                           | 370699.08±54170.92 <sup>b</sup> | 391973.14±70603.86 <sup>ab</sup> | 447796.13±9602.87 <sup>ab</sup>  | 468070.06±9958.94 <sup>a</sup>  |
|                          | 56                           | 353430.35±34954.65 <sup>a</sup> | 321653.4±42123.78 <sup>a</sup>   | 323524.5±3635.5 <sup>a</sup>     | 320711.44±2813.44 <sup>a</sup>  |
|                          | 43                           | 322632.12±39875.88 <sup>a</sup> | 325176.02±22537 <sup>a</sup>     | 301738.5±44173.5 <sup>a</sup>    | 277955.35±41117.65 <sup>a</sup> |
|                          | 37                           | 325052.7±15478.7 <sup>a</sup>   | 236784.91±37387.09 <sup>b</sup>  | 228831.63±26259.37 <sup>b</sup>  | 204386.88±48226.12 <sup>b</sup> |
|                          | 26                           | 309473.47±38249.53 <sup>a</sup> | 242445.08±24091.88 <sup>b</sup>  | 228297.84±20133.34 <sup>b</sup>  | 189743.75±27106.25 <sup>b</sup> |
|                          | 18                           | 275475±18805.37 <sup>a</sup>    | 255146.33±14638.76 <sup>a</sup>  | 224830.67±4632.88 <sup>b</sup>   | 218493.67±10131.51 <sup>b</sup> |
| myofibrillar<br>proteins | 100                          | 114533.71±16252.05 <sup>a</sup> | 129693.89±25777.95 <sup>a</sup>  | 134971.33±1019.67 <sup>a</sup>   | 147431.43±24945.05 <sup>a</sup> |
|                          | 70                           | 79749.45±28845.55 <sup>a</sup>  | 54637.81±24492.81 <sup>ab</sup>  | 20334.20±5228.80 <sup>b</sup>    | 28118.77±9019.23 <sup>b</sup>   |
|                          | 65                           | 173657.69±6946.31 <sup>a</sup>  | 82793.12±12398.41 <sup>b</sup>   | 87532.48±5889.24 <sup>b</sup>    | 77396.00±7036.00 <sup>b</sup>   |
|                          | 43                           | 250270.40±14105.43 <sup>b</sup> | 262050.88±9215.30 <sup>ab</sup>  | 250681.79±12776.44 <sup>b</sup>  | 283424.16±10588.80 <sup>a</sup> |
|                          | 36                           | 83305.51±22181.57 <sup>a</sup>  | 84706.67±1041.87 <sup>a</sup>    | 81204.07±6613.50 <sup>a</sup>    | 85734.53±1242.53 <sup>a</sup>   |
|                          | 33                           | 60736.00±11680.00 <sup>a</sup>  | 70025.69±2598.68 <sup>a</sup>    | 70803.23±4592.77 <sup>a</sup>    | 70589.88±8208.13 <sup>a</sup>   |
|                          | 26                           | 58725.56±3595.44 <sup>b</sup>   | 72350.57±6318.43 <sup>a</sup>    | 77901.07±1277.07 <sup>a</sup>    | 77172.69±1846.40 <sup>a</sup>   |

Optical density was expressed as mean values ± standard deviation (SD) obtained from three replicates of each group. <sup>a-b</sup> different lowercase letters

mean significant difference among groups.

ND: Not detected.

Table S2 Summary of the identified and analyzed metabolites in Rugao ham samples and their numbers on <sup>1</sup>H NMR spectra.

| No. | Metabolite       | $\delta^1\text{H}(\text{ppm})$ and multiplicity      |
|-----|------------------|------------------------------------------------------|
| 1   | Butyrate         | 0.88(t), 1.54(m)                                     |
| 2   | Isoleucine       | 3.67(d), 1.98(m), 1.26(m), 1.48(m), 1.01(d), 0.94(t) |
| 3   | Leucine          | 3.74(m), 1.73(m), 1.69(m), 0.98(d), 0.96(d)          |
| 4   | Valine           | 3.62(d), 2.28(m), 0.99(d), 1.04(d)                   |
| 5   | Lactate          | 4.13(q), 1.33(d)                                     |
| 6   | Alanine          | 3.79(q), 1.49(d)                                     |
| 7   | Arginine         | 1.92(m), 1.66(m), 3.26(t), 3.76(t)                   |
| 8   | Lysine           | 3.76(t), 3.03(t), 1.92(m), 1.73(m), 1.48(d)          |
| 9   | Acetate          | 1.92(s)                                              |
| 10  | Glutamate        | 3.77(m), 2.36(dt), 2.12(m)                           |
| 11  | Proline          | 4.1(m), 3.4(dt), 2.1(m)                              |
| 12  | Succinate        | 2.41(s)                                              |
| 13  | Methionine       | 3.85(dd), 2.15(m), 2.65(t), 2.14(s)                  |
| 14  | Aspartate        | 3.92(dd), 2.80(dd), 2.70(dd)                         |
| 15  | Creatine         | 3.04(s), 3.93(s)                                     |
| 16  | Creatinine       | 4.06(s), 3.05(s)                                     |
| 17  | Carnosine        | 8.50(s), 7.19(s), 3.21(m)                            |
| 18  | Taurine          | 3.44(t), 3.29(t)                                     |
| 19  | Glycerol         | 3.57(dd), 3.67(dd), 3.80(dd)                         |
| 20  | $\beta$ -glucose | 3.91(dd), 3.76(m), 3.42(m)                           |
| 21  | myo-Inositol     | 4.12(dd), 3.75(t)                                    |
| 22  | Choline          | 4.07(d), 3.53(d), 3.21(s)                            |
| 23  | Betaine          | 3.91(s), 3.27(s)                                     |
| 24  | Serine           | 4.0(dd), 3.9(dd)                                     |
| 25  | Threonine        | 4.26(m), 3.58(d)                                     |
| 26  | Tyrosine         | 7.2(d), 6.90(d)                                      |
| 27  | Phenylalanine    | 7.33(q), 7.43(t), 7.38(m)                            |
| 28  | Uracil           | 7.54(d), 5.81(d)                                     |
| 29  | Uridine          | 5.9(m), 7.9(m)                                       |
| 30  | Inosine          | 8.23(s), 8.34(s), 6.10(d)                            |
| 31  | Nicotinamide     | 8.95(d), 8.62(dd), 8.26(m)                           |
| 32  | Formate          | 8.46(s)                                              |
| 33  | AMP              | 8.23(s), 8.59(s), 6.15(d)                            |
| 34  | Anserine         | 8.63(s), 7.28(s), 4.51(dd), 3.77(s)                  |
